# Supplementary material
Source: Springer Nature journal article supplement (https://www.springermedizin.de/resource/supplementary/12960_2009_203_MOESM2_ESM.pdf/9570646)
Supplement: MOESM2 [file 9570646]

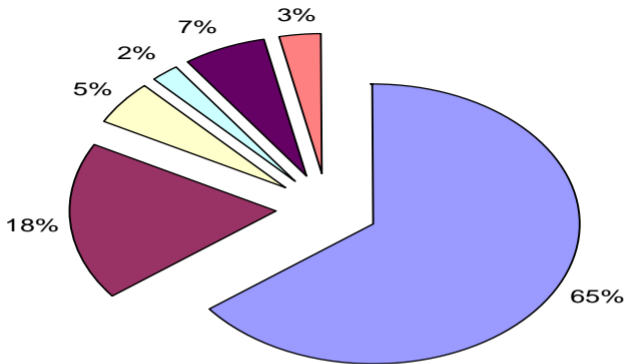

- Equal to unionized workers, including benefits
- Equal to unionized workers, plus productivity incentives
- Equal to unionized workers, no benefits
- Same as current salary
- Alternative forms of payment with greater incentives
- No response
